# Supplementary material for: Selection of Gut-Resistant Bacteria and Construction of Microbial Consortia for Improving Gluten Digestion under Simulated Gastrointestinal Conditions
Source: MDPI journal article supplement (doi:10.3390/nu13030992), 2021-03-19
Supplement: s1 [file s1]

# PepN

Low\*

Medium\*

High\*

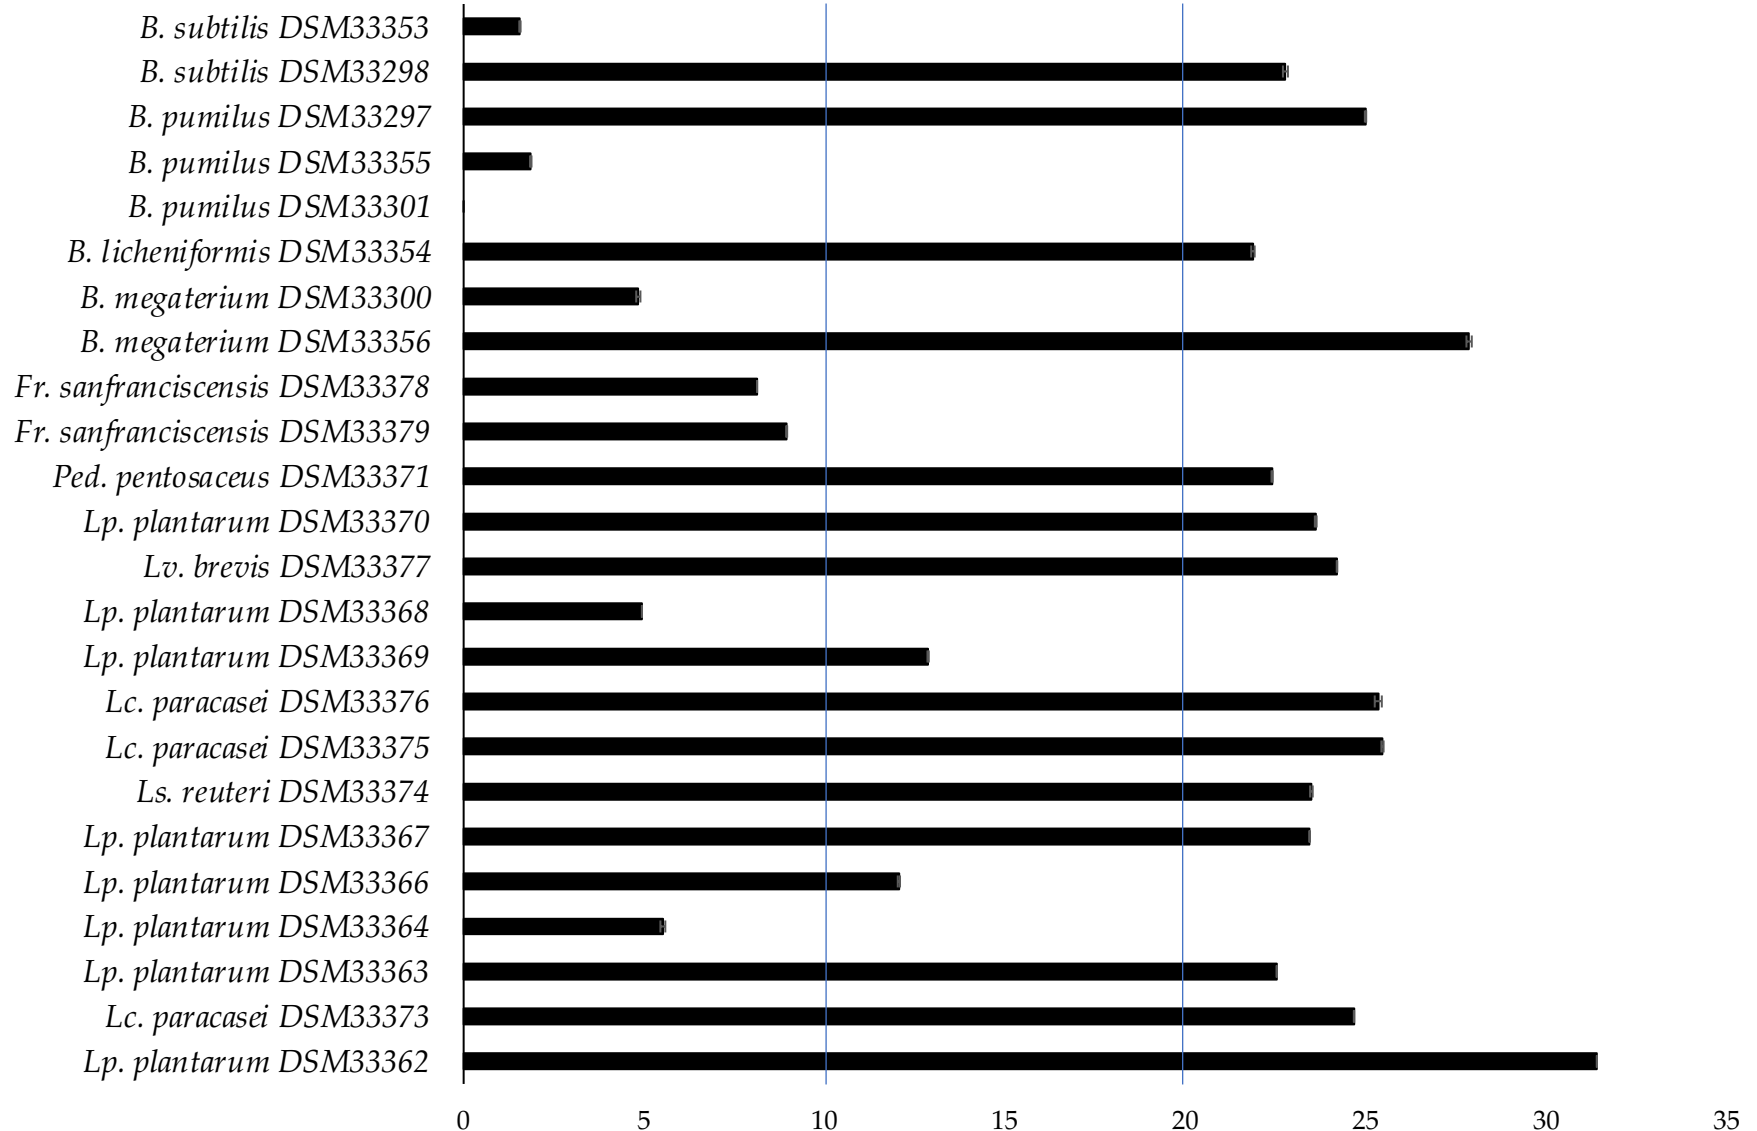

\*Low, medium, and high activity

U

# PepI

Low\*

Medium\*

High\*

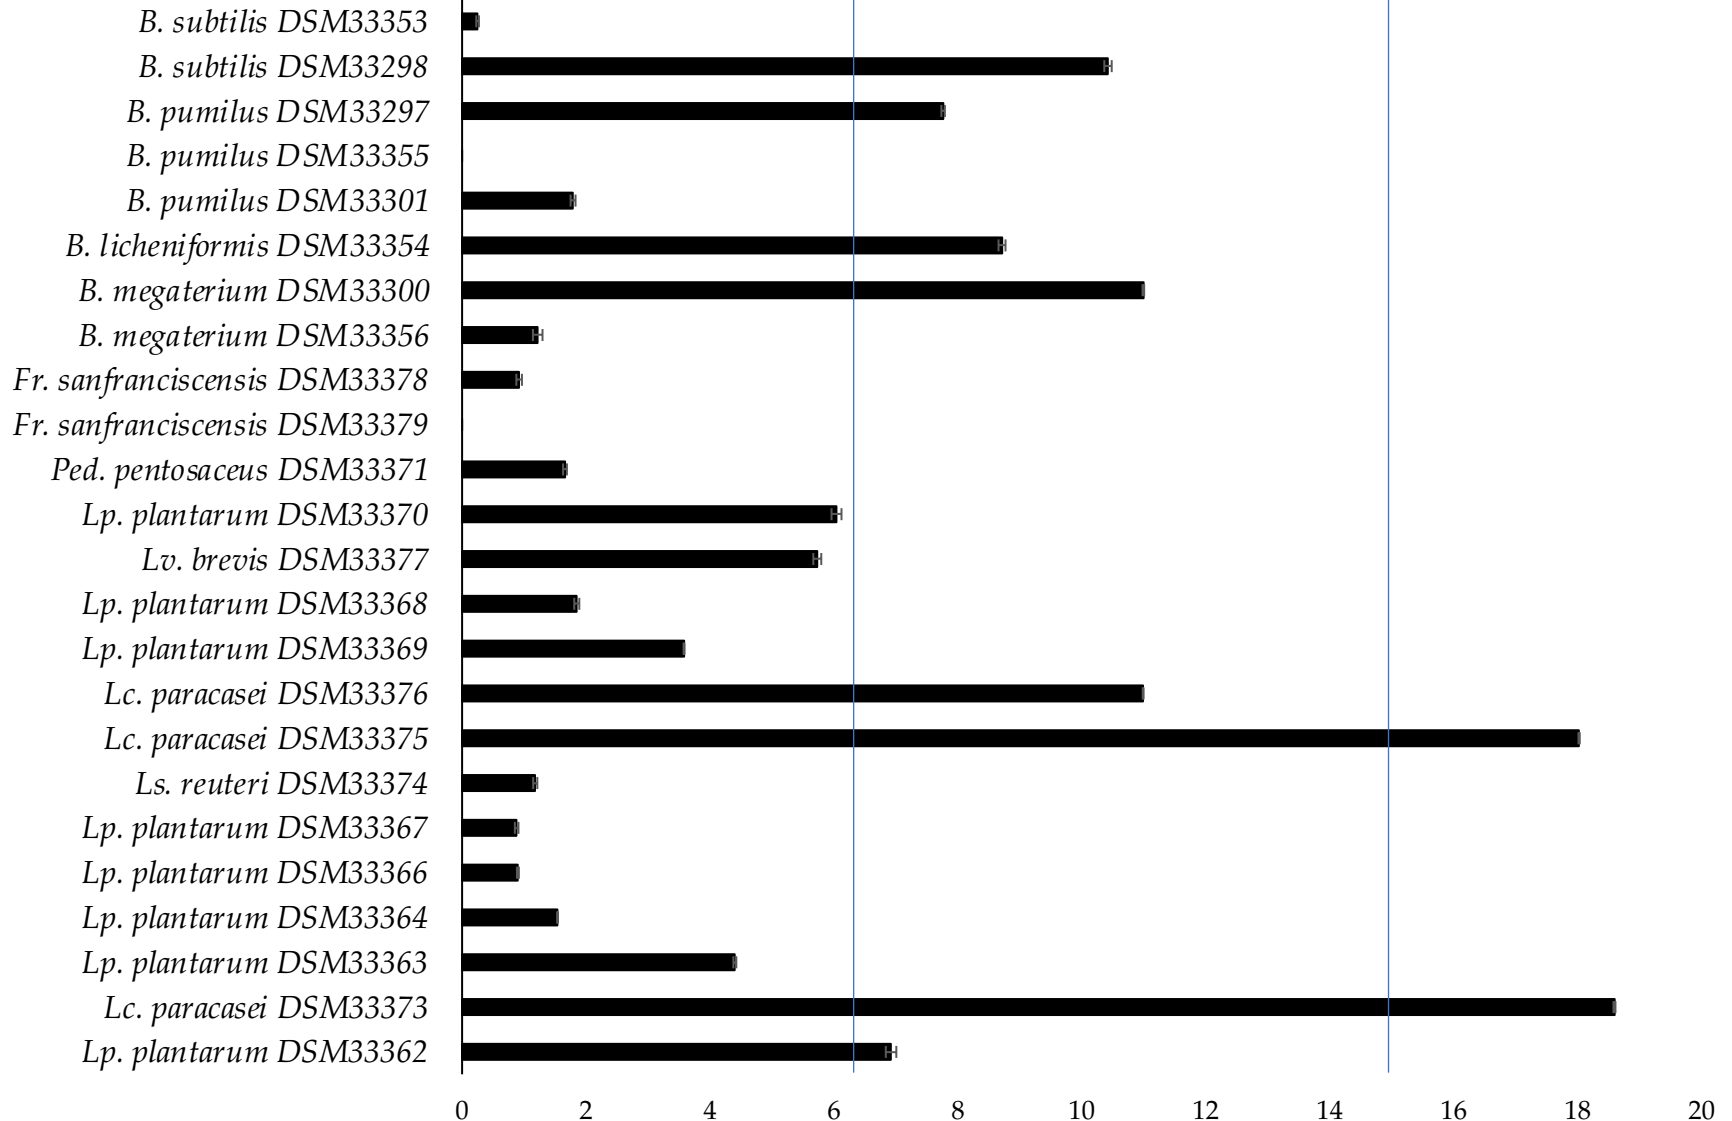

\*Low, medium, and high activity

U

# PepX

Low\*

Medium\*

High\*

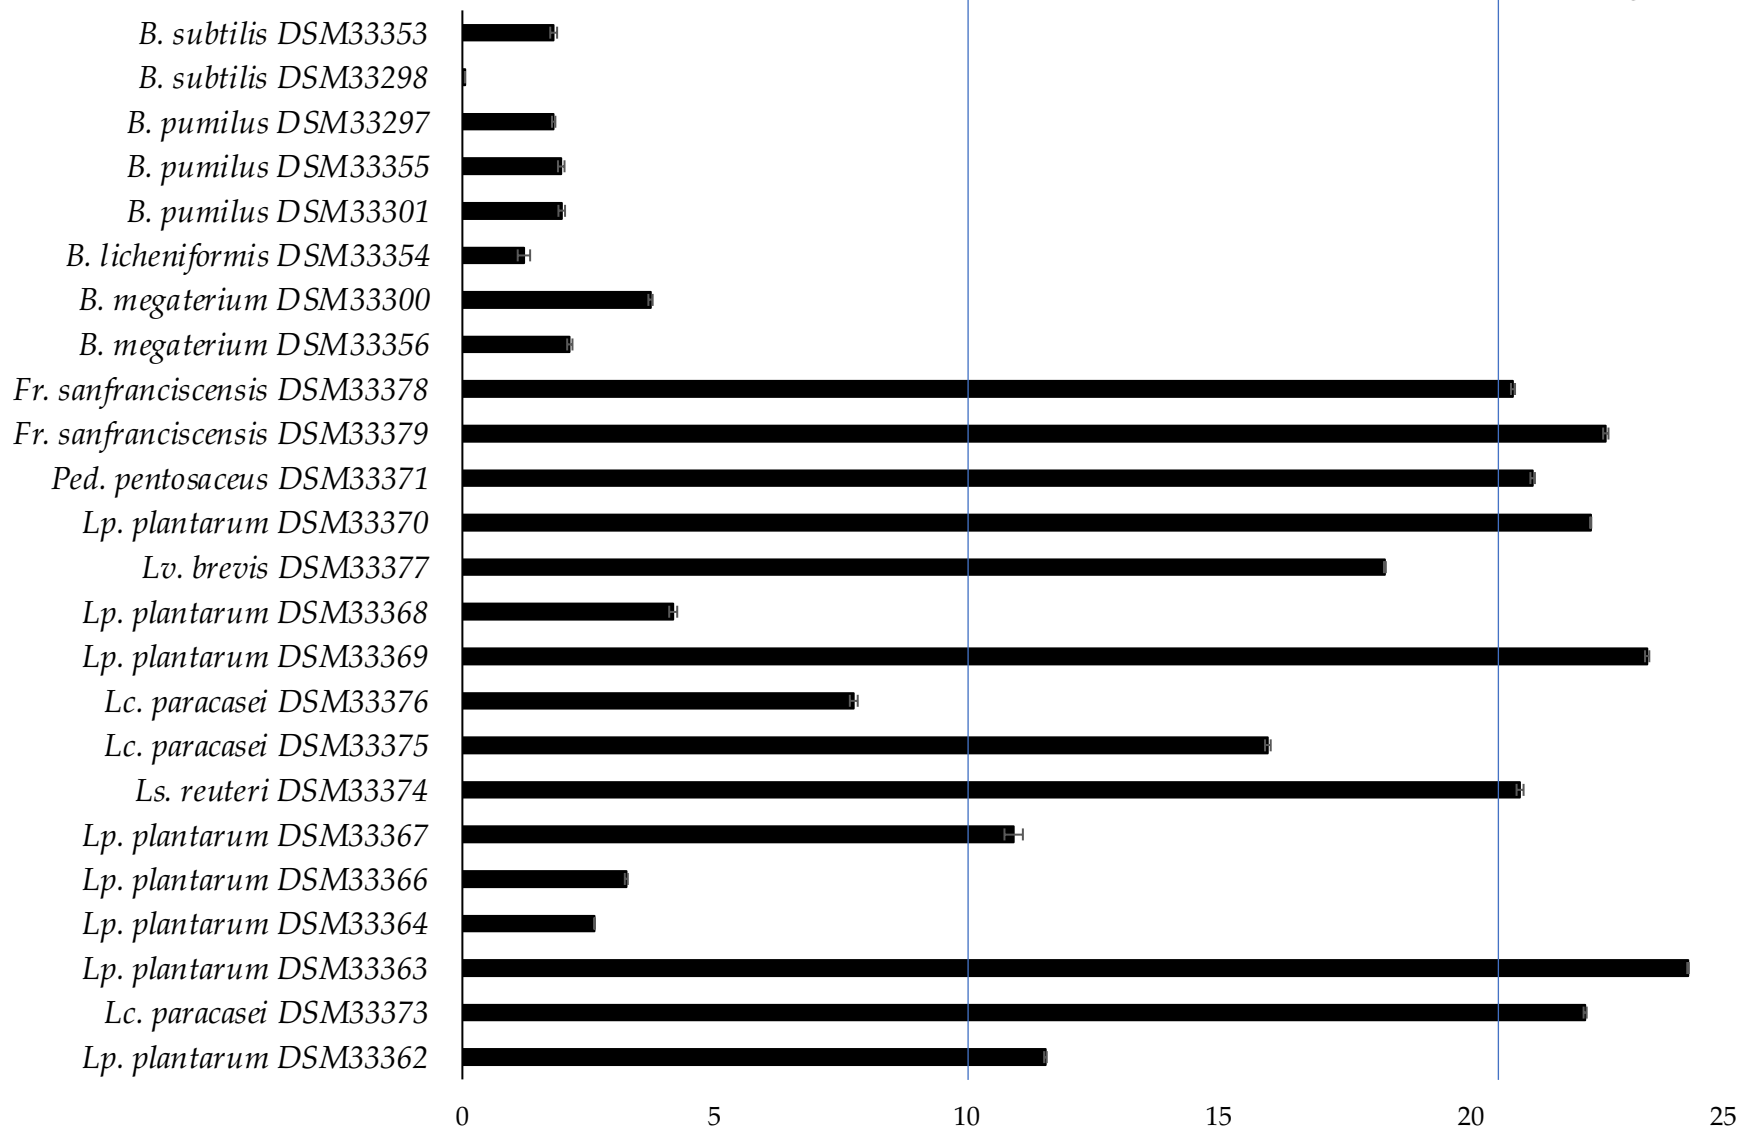

\*Low, medium, and high activity

U

# PepO

Low\*

Medium\*

High\*

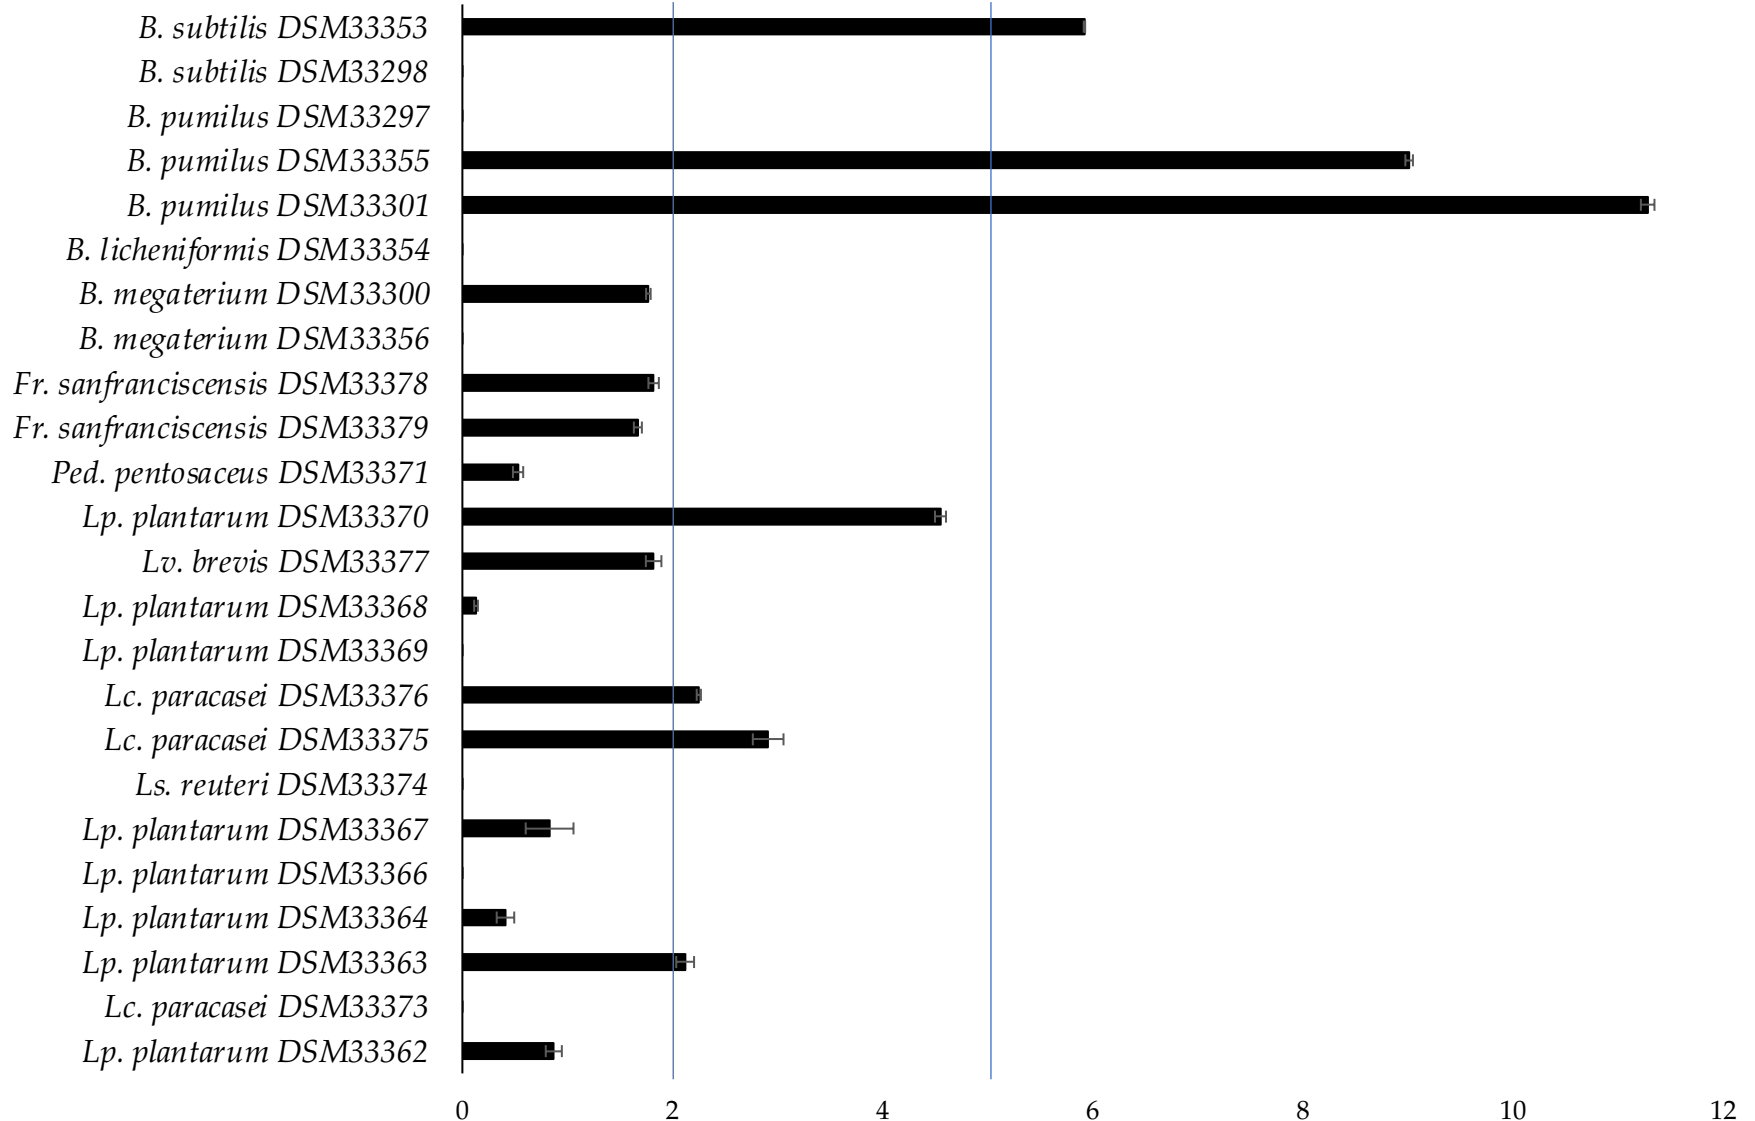

\*Low, medium, and high activity

U

# PepP

Low\*

Medium\*

High\*

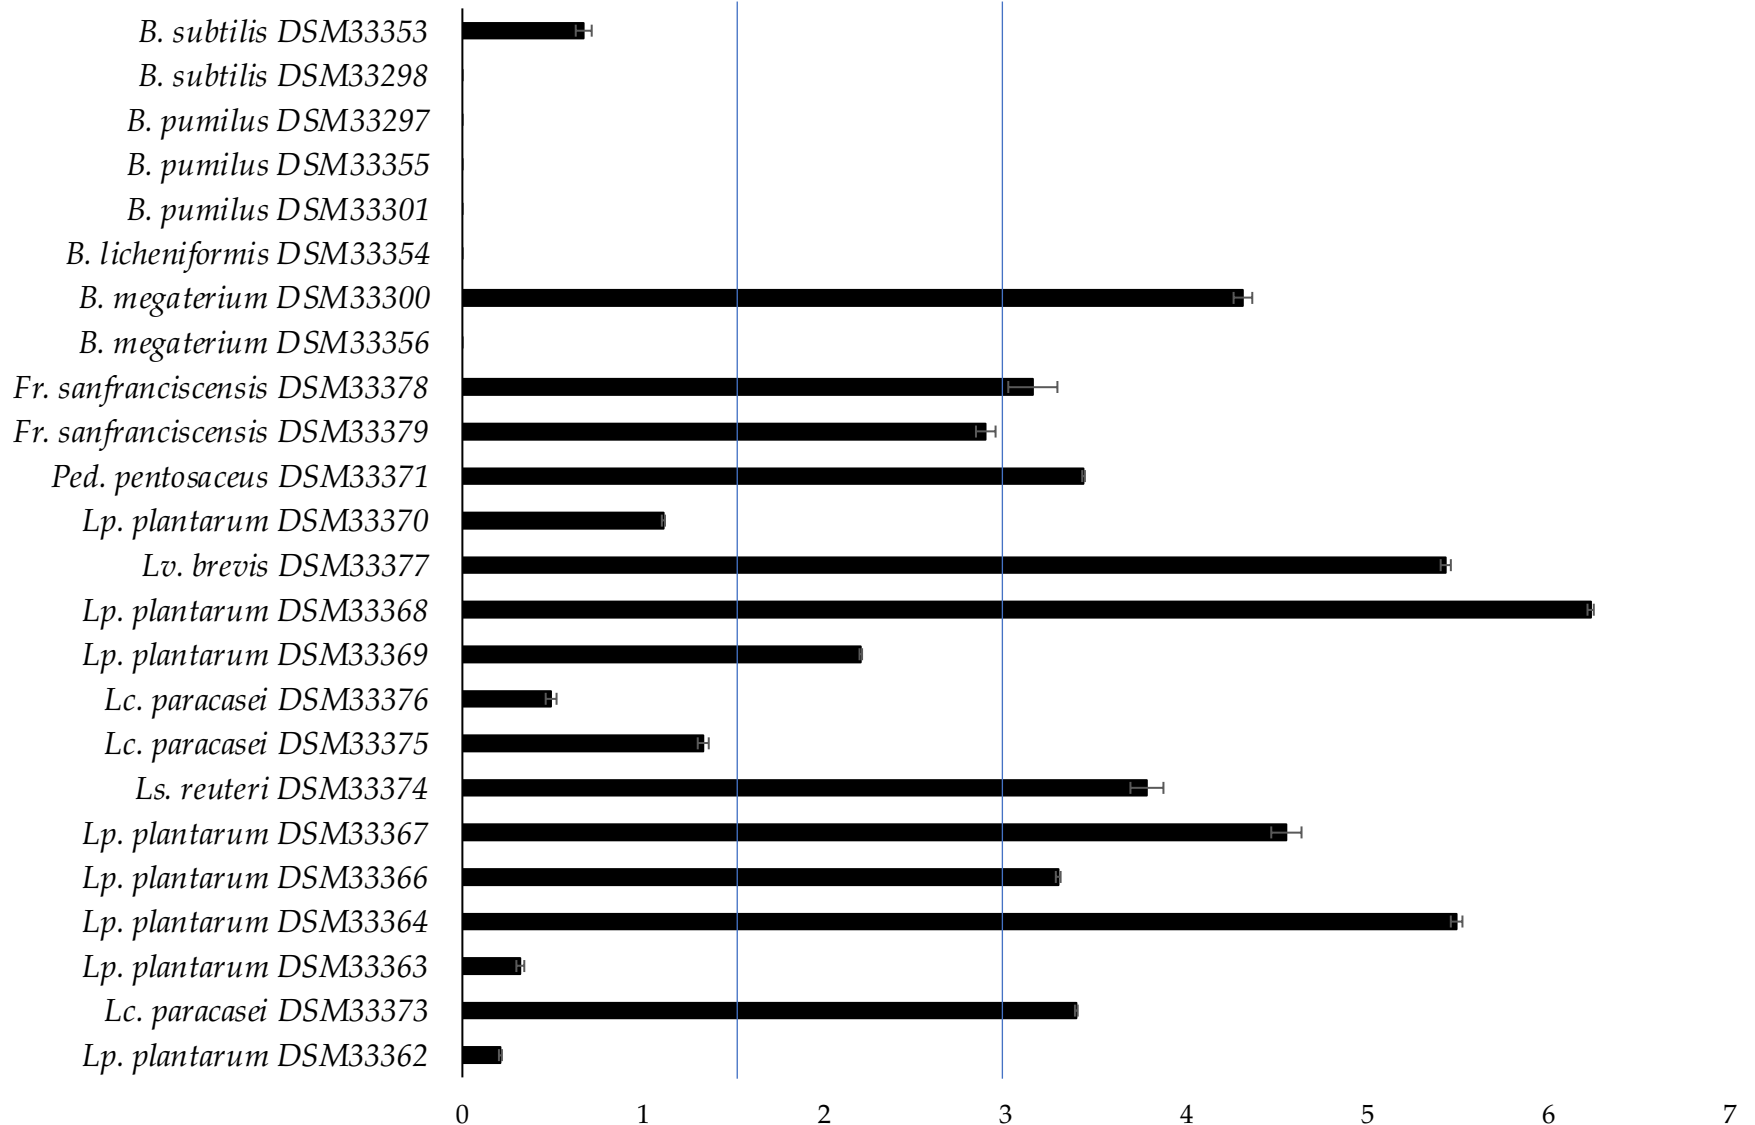

\*Low, medium, and high activity

U
