# Supplementary material for: Selection of Gut-Resistant Bacteria and Construction of Microbial Consortia for Improving Gluten Digestion under Simulated Gastrointestinal Conditions
Source: MDPI journal article supplement (doi:10.3390/nu13030992), 2021-03-19
Supplement: s1 [file s1]

Resistance of strains to simulated gastric and intestinal conditions

### Resistance of strains to simulated gastric and intestinal conditions

**Duodenal biopsy**

RT-PCR; ELISA

- IFN- $\gamma$
- IL-2
- IL-10

### Duodenal biopsy

|                  |               |
|------------------|---------------|
| RT-PCR;<br>ELISA | IFN- $\gamma$ |
|                  | IL-2          |
|                  | IL-10         |

bread

bacteria

enzymatic  
mixture

R5-ELISA

The diagram on the left illustrates the aggregation of amylose chains. It shows individual amylose chains (represented by wavy lines) and their assembly into a double helix structure, which then further aggregates into a larger, more complex network. The micrograph on the right shows a series of dark, horizontal bands, likely representing the aggregation of amylose chains in a solution.

[illegible]

57-68 (Q-L-Q-P-F-P-Q-P-Q-L-P-Y) of  $\alpha$ 9-gliadin  
62-75 (P-Q-P-Q-L-P-Y-P-Q-P-Q-S-F-P) of A-gliadin  
134-153 (Q-Q-L-P-Q-P-Q-P-Q-Q-S-F-P-Q-Q-R-P-F) of  $\gamma$ -gliadin,  
(L-Q-L-Q-P-F-P-Q-P-Q-L-P-Y-P-Q-P-Q-L-P-Y-P-Q-P-Q-P-F) (33-mer)

57-68 (Q-L-Q-P-F-P-Q-P-Q-L-P-Y) of  $\alpha 9$ -gliadin

62-75 (P-Q-P-Q-L-P-Y-P-Q-P-Q-S-F-P) of A-gliadin

134-153 (Q-Q-L-P-Q-P-Q-Q-P-Q-Q-S-F-P-Q-Q-Q-R-P-F) of  $\gamma$ -gliadin.

(L-Q-L-Q-P-F-P-Q-P-Q-L-P-Y-P-Q-P-Q-L-P-Y-P-Q-P-Q-P-F) (33-mer)

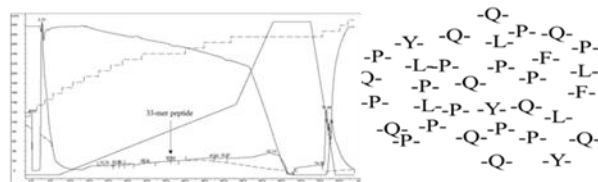
$$\begin{array}{ccccccc}
 & & & -Q- & & & \\
 & & -Y- & -Q- & -L- & -P- & -Q- & -P- \\
 -P- & & & & & & & \\
 Q- & & -L- & -P- & & -P- & -F- & -L- \\
 & & & -P- & -Q- & & & -F- \\
 -P- & & -L- & -P- & -Y- & -Q- & -L- & \\
 & & & -Q- & -P- & & & \\
 & & -P- & & & & & \\
 & & & -Q- & -P- & -P- & -Q- & \\
 & & & & & & & \\
 & & & -Q- & & & & -Y-
 \end{array}$$
