# Supplementary figures and images for: Selection of Gut-Resistant Bacteria and Construction of Microbial Consortia for Improving Gluten Digestion under Simulated Gastrointestinal Conditions
Source: MDPI journal article supplement (doi:10.3390/nu13030992), 2021-03-19

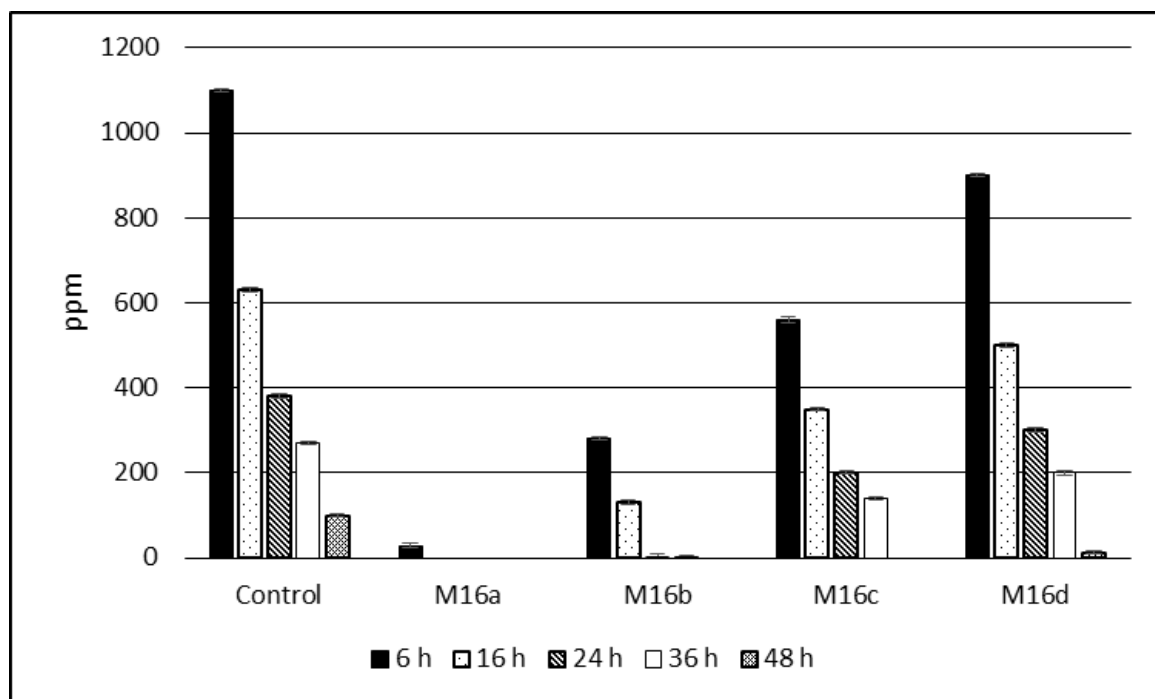

Supplement: s1 [file s1]

**A**

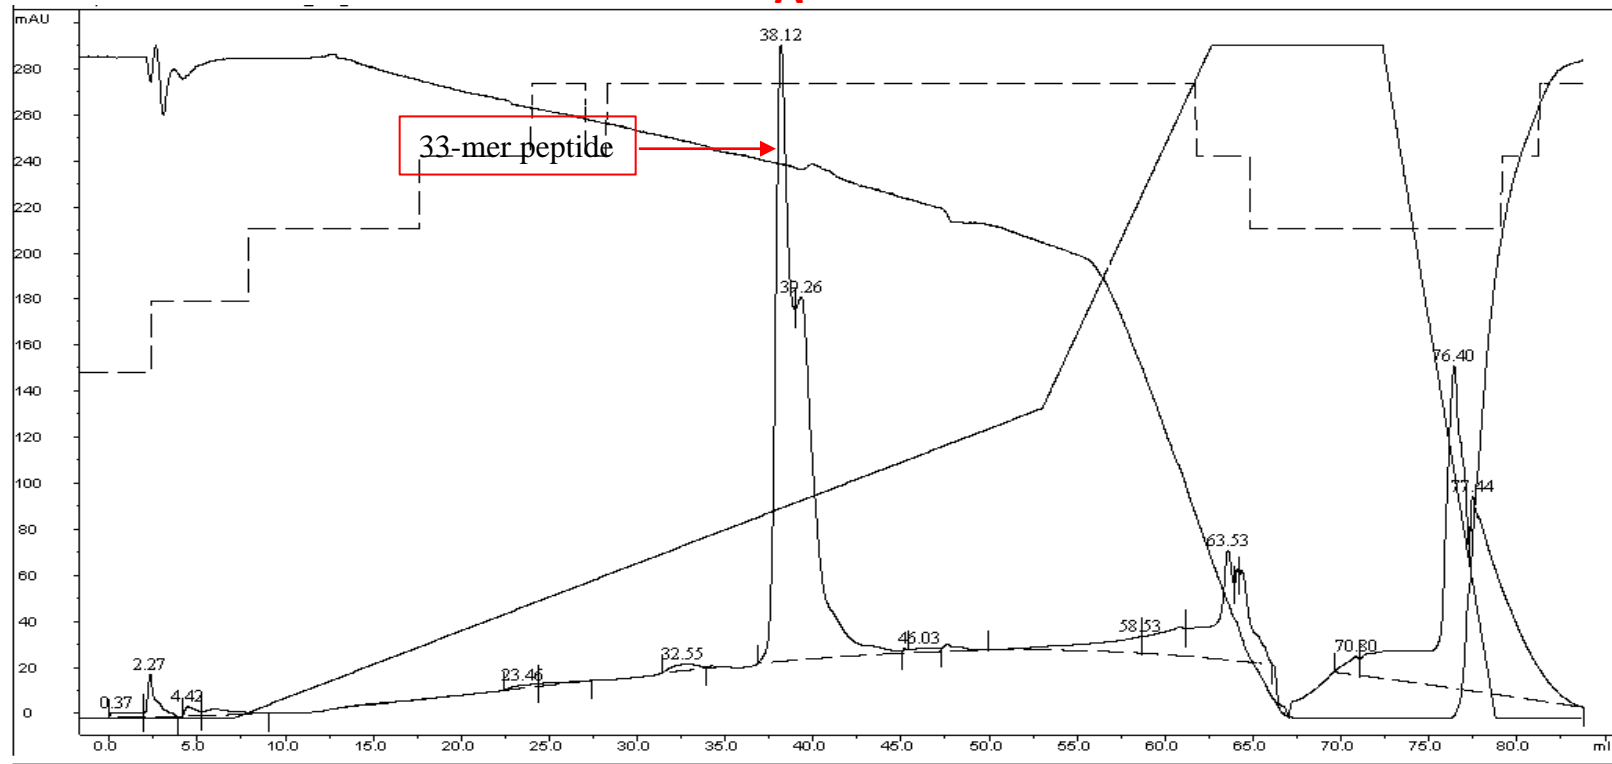

**B**

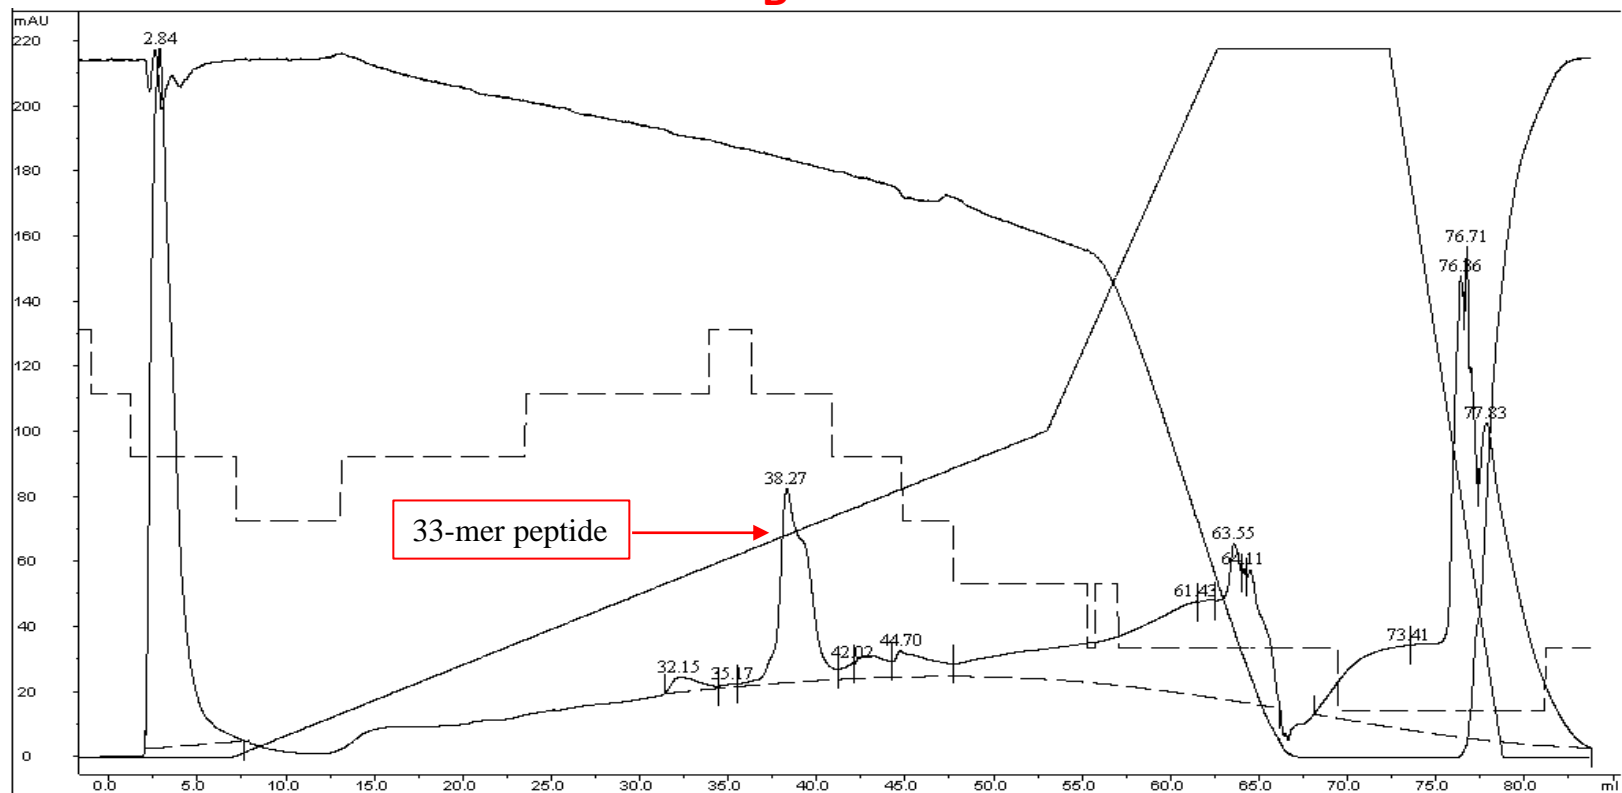

C

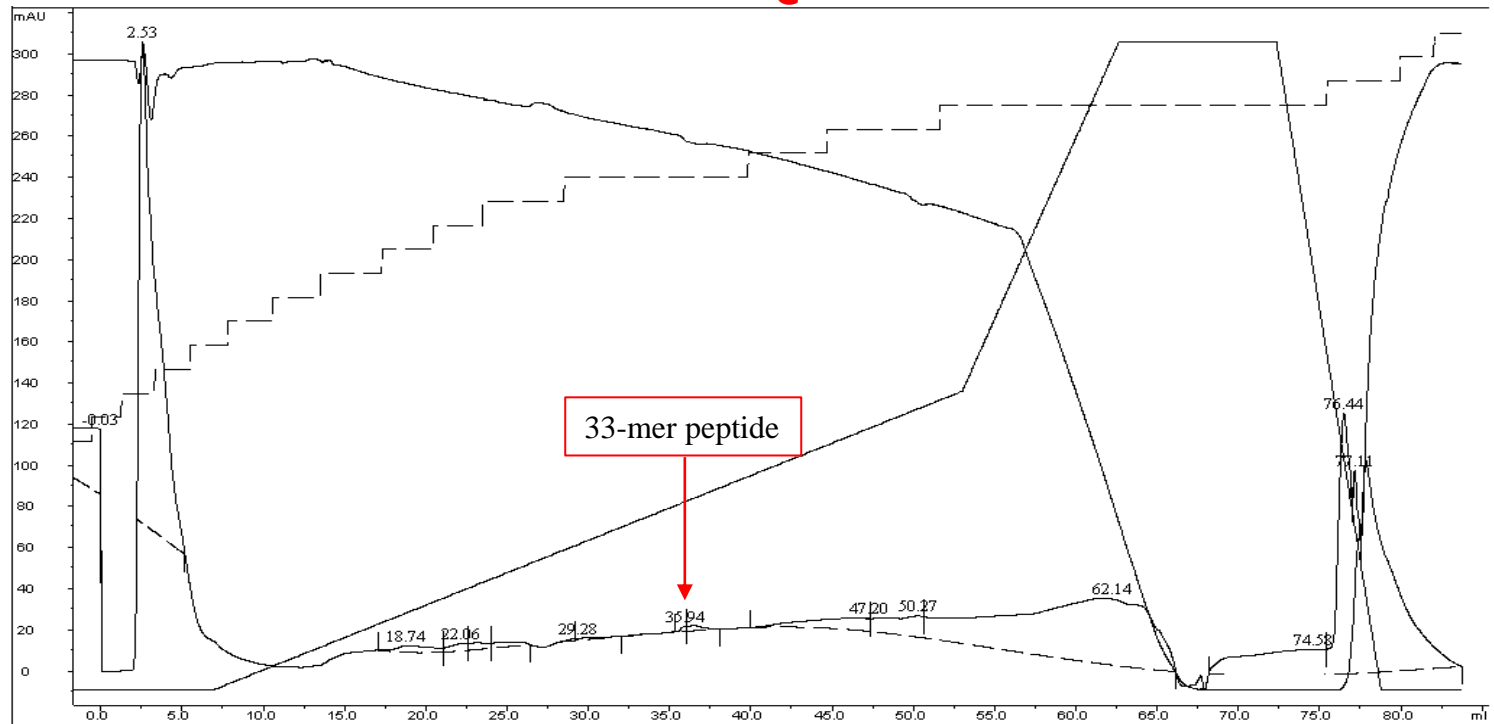

D

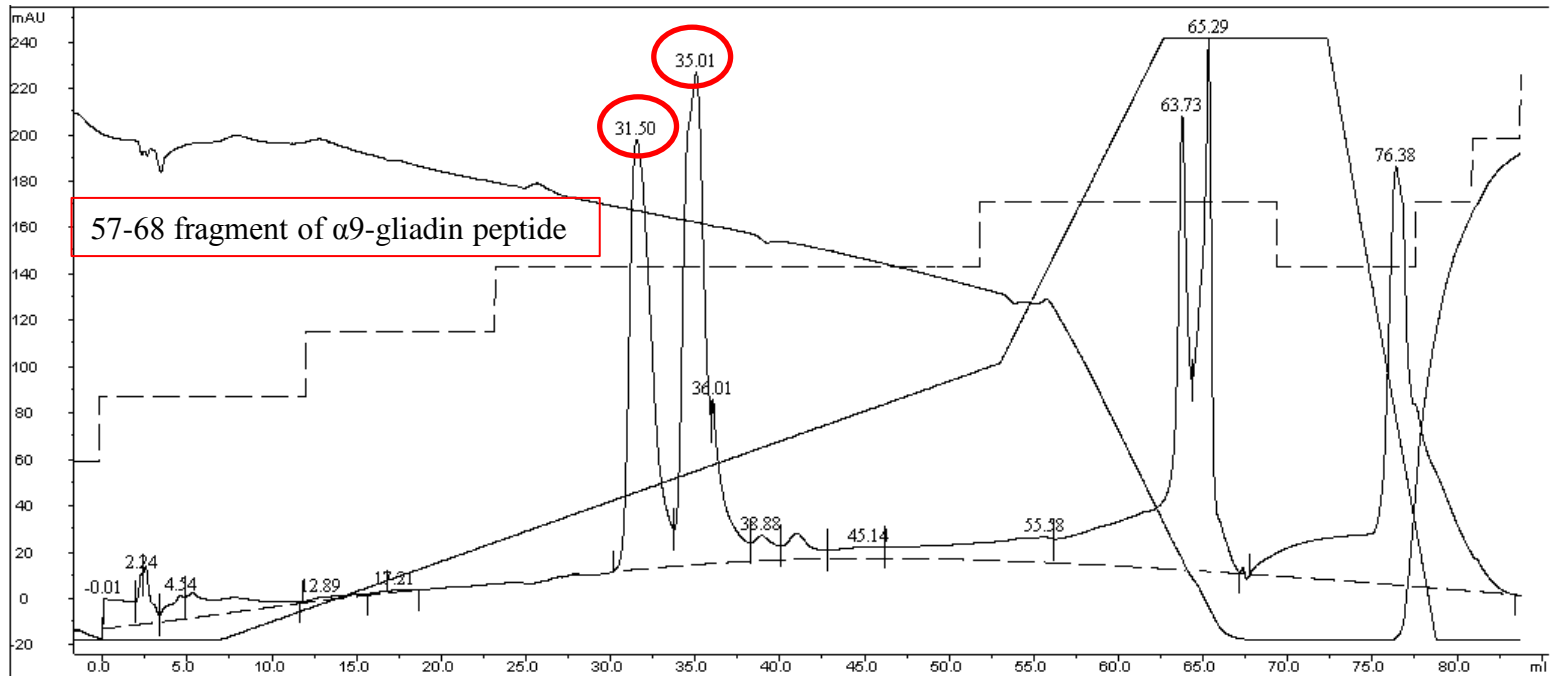

E

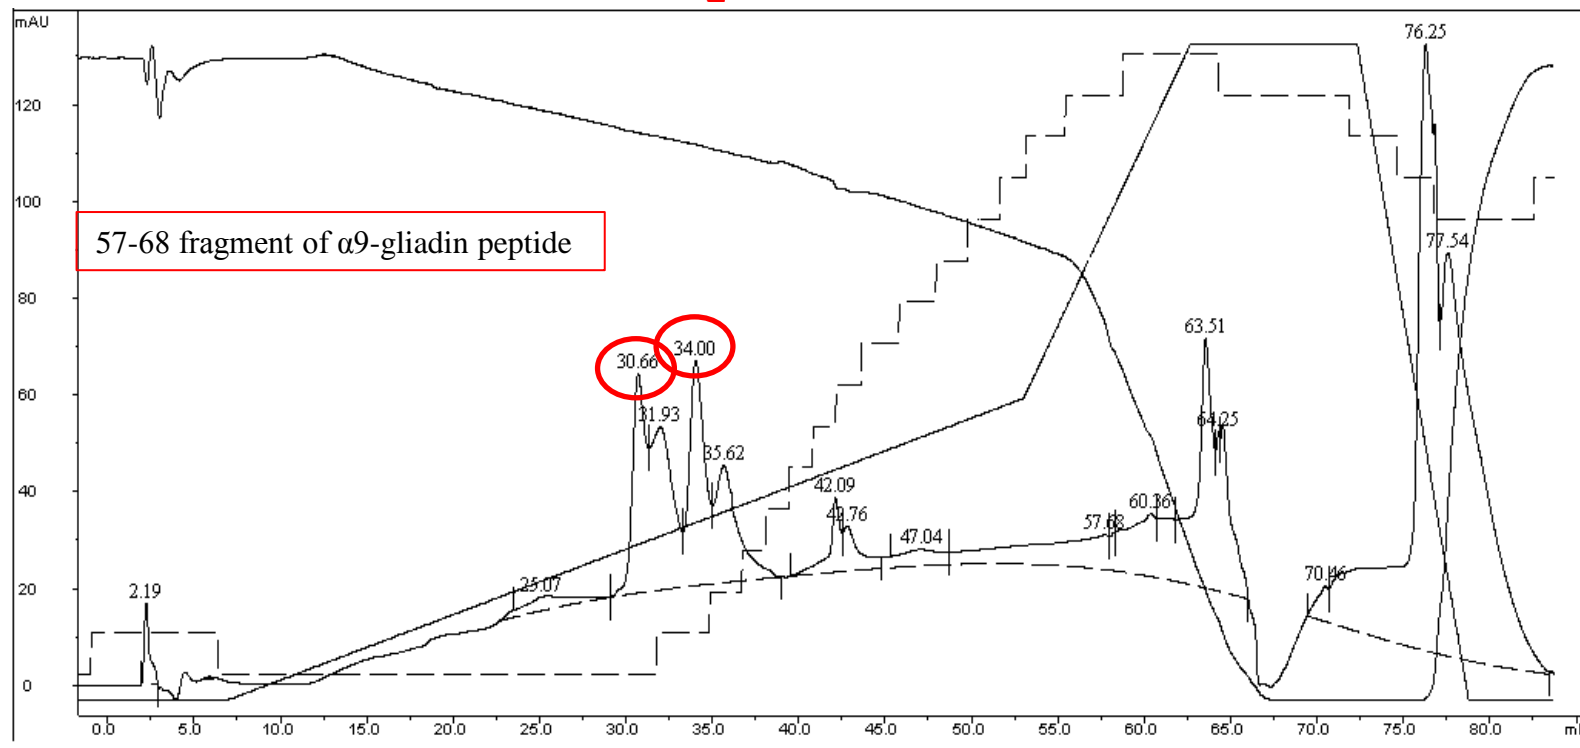

F

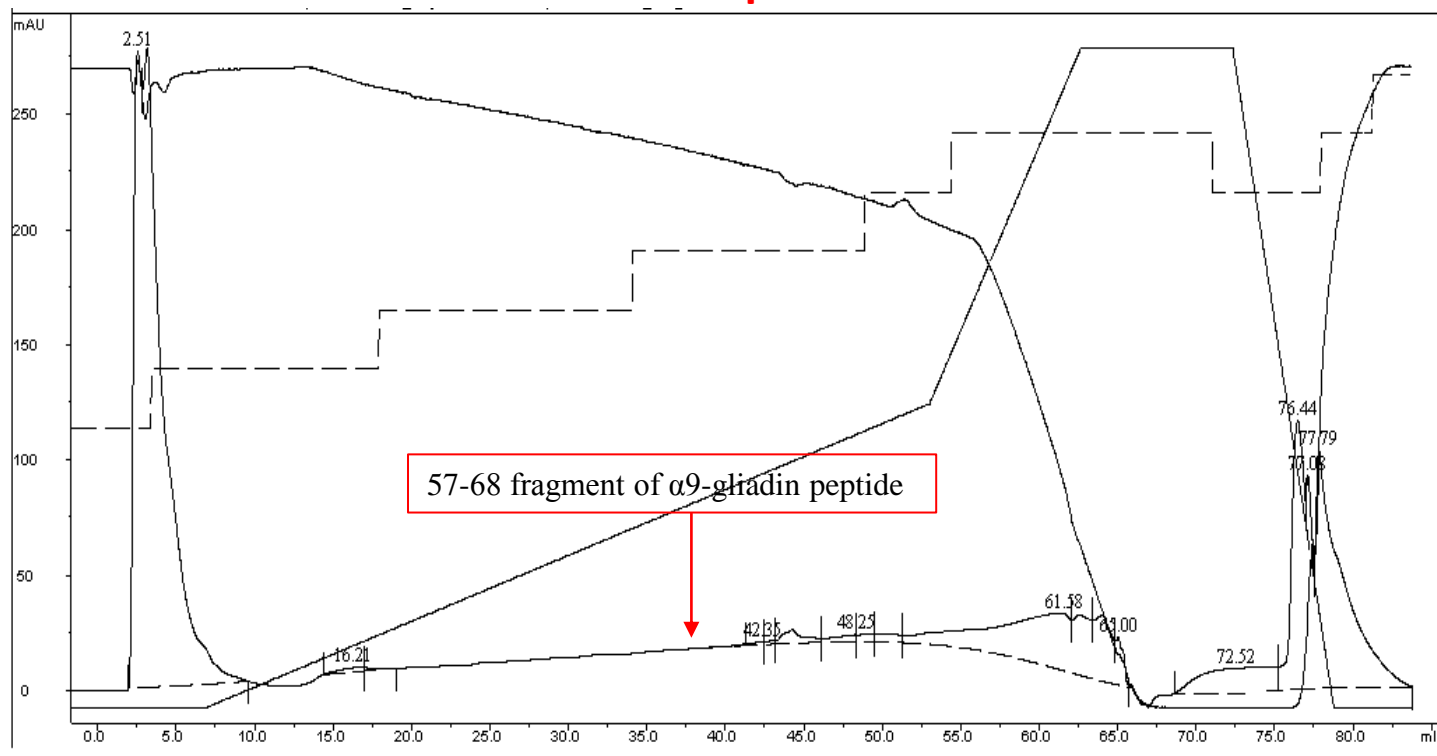

**G**

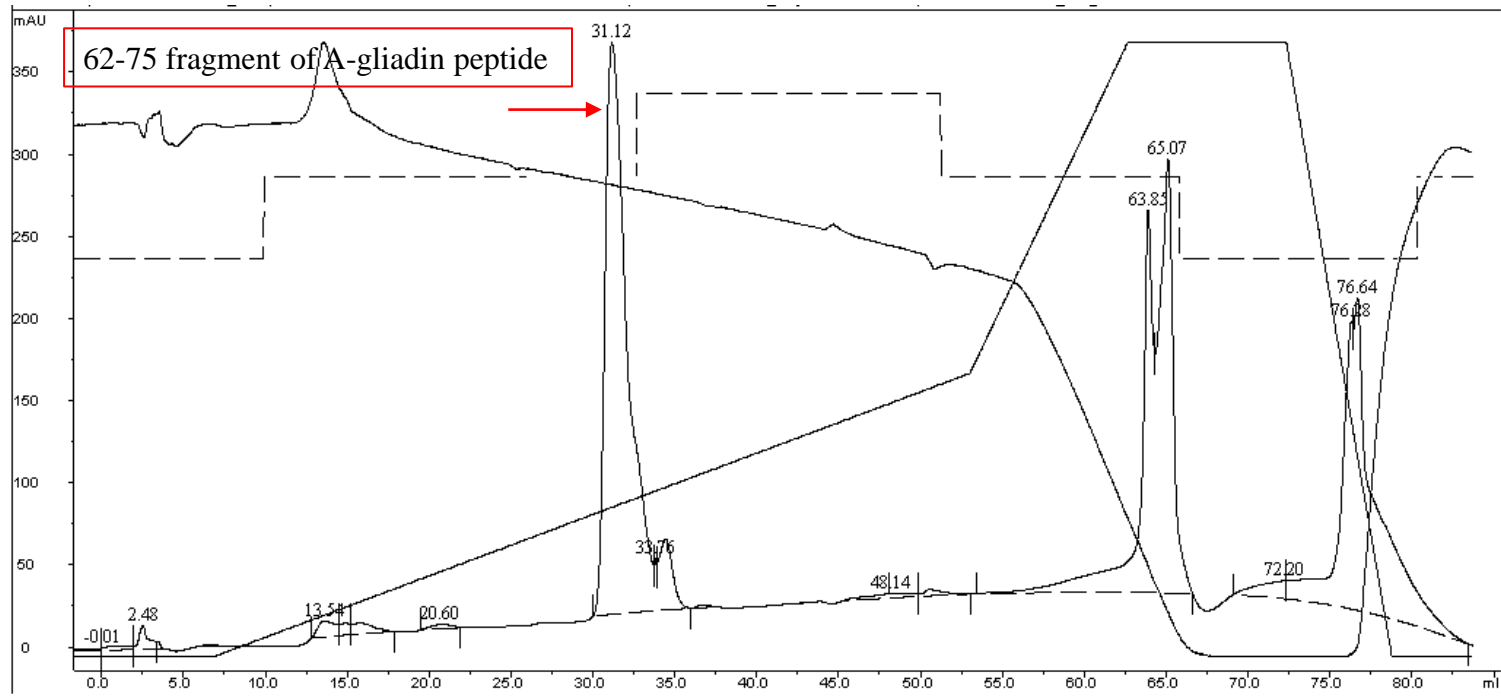

H

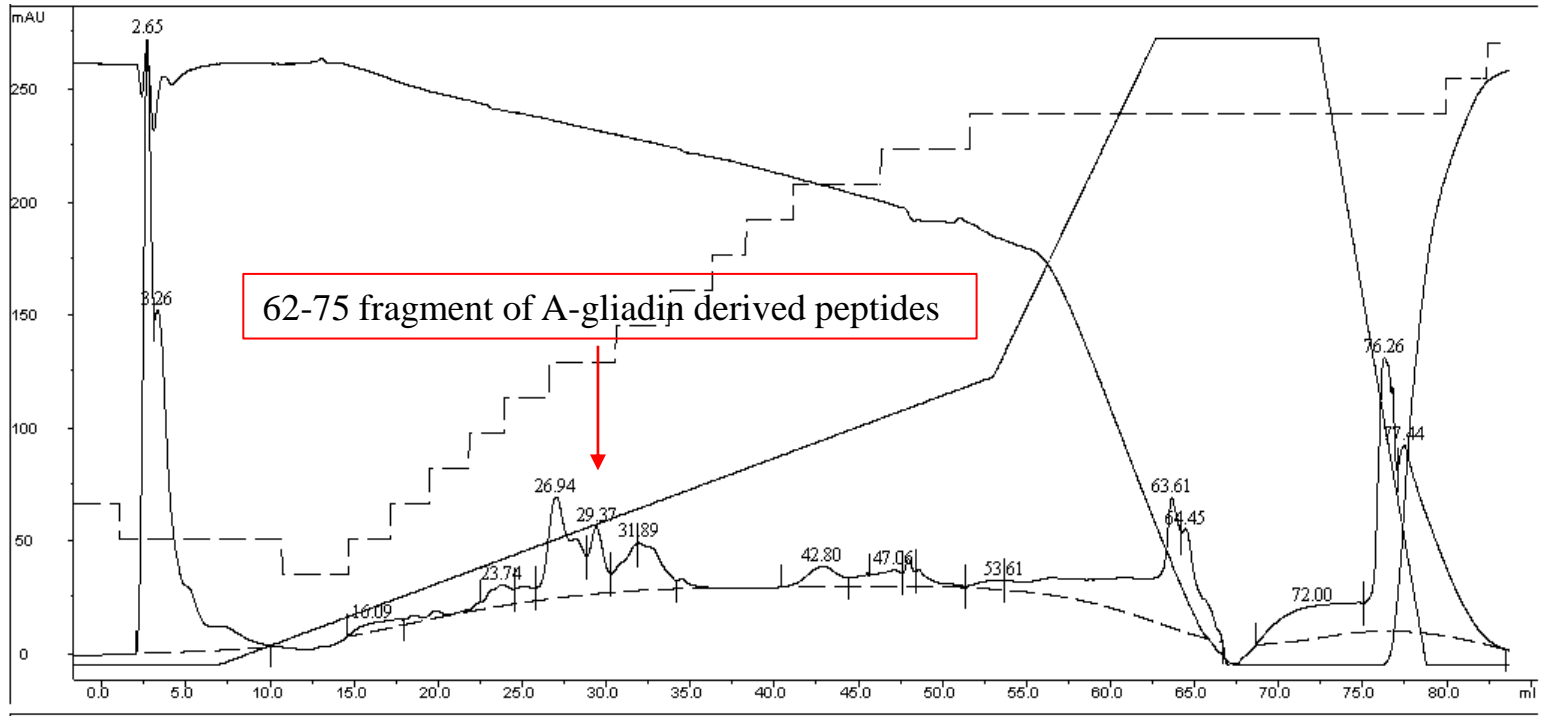



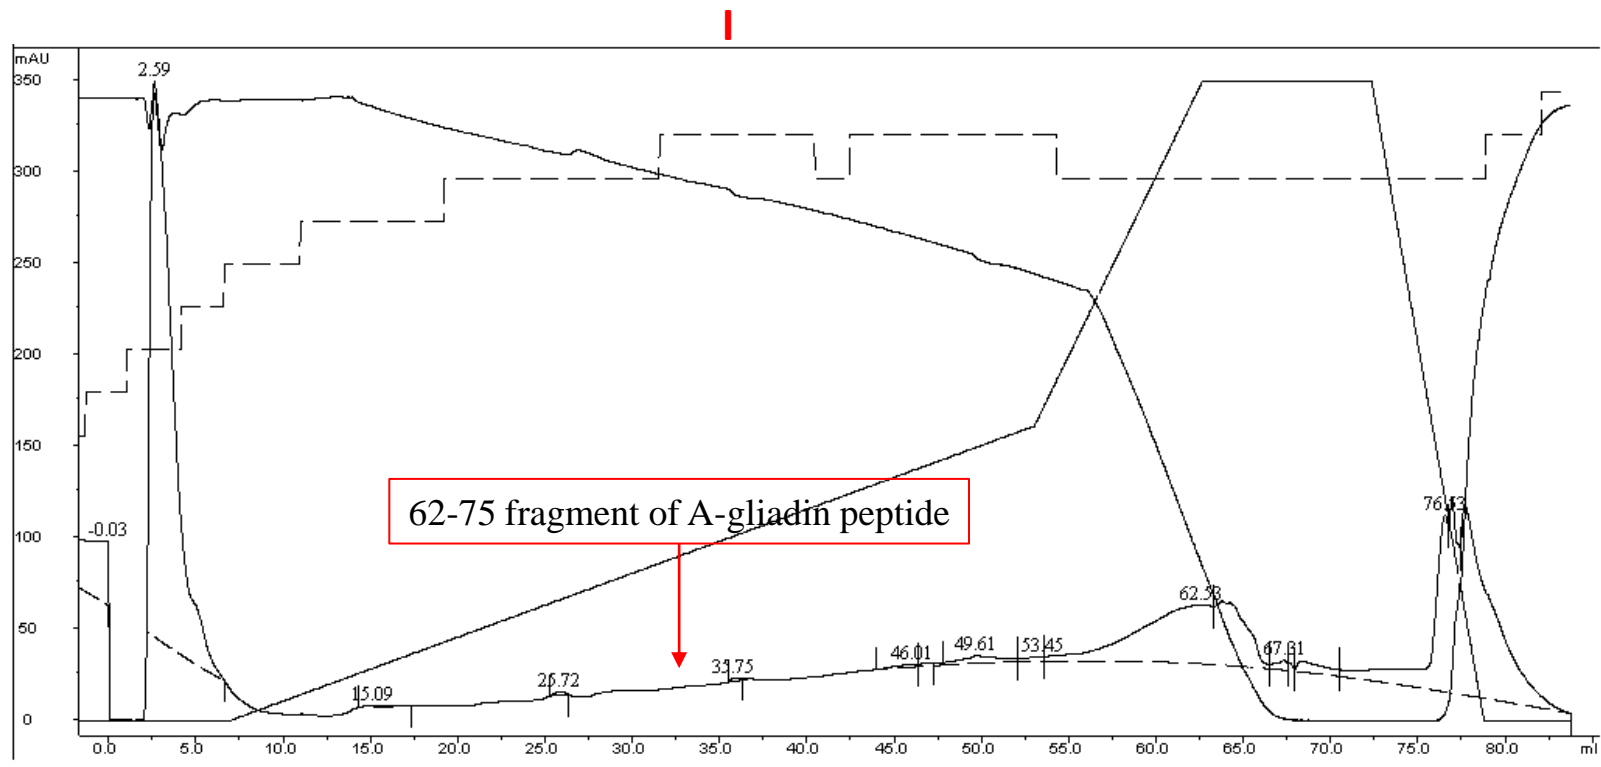

J

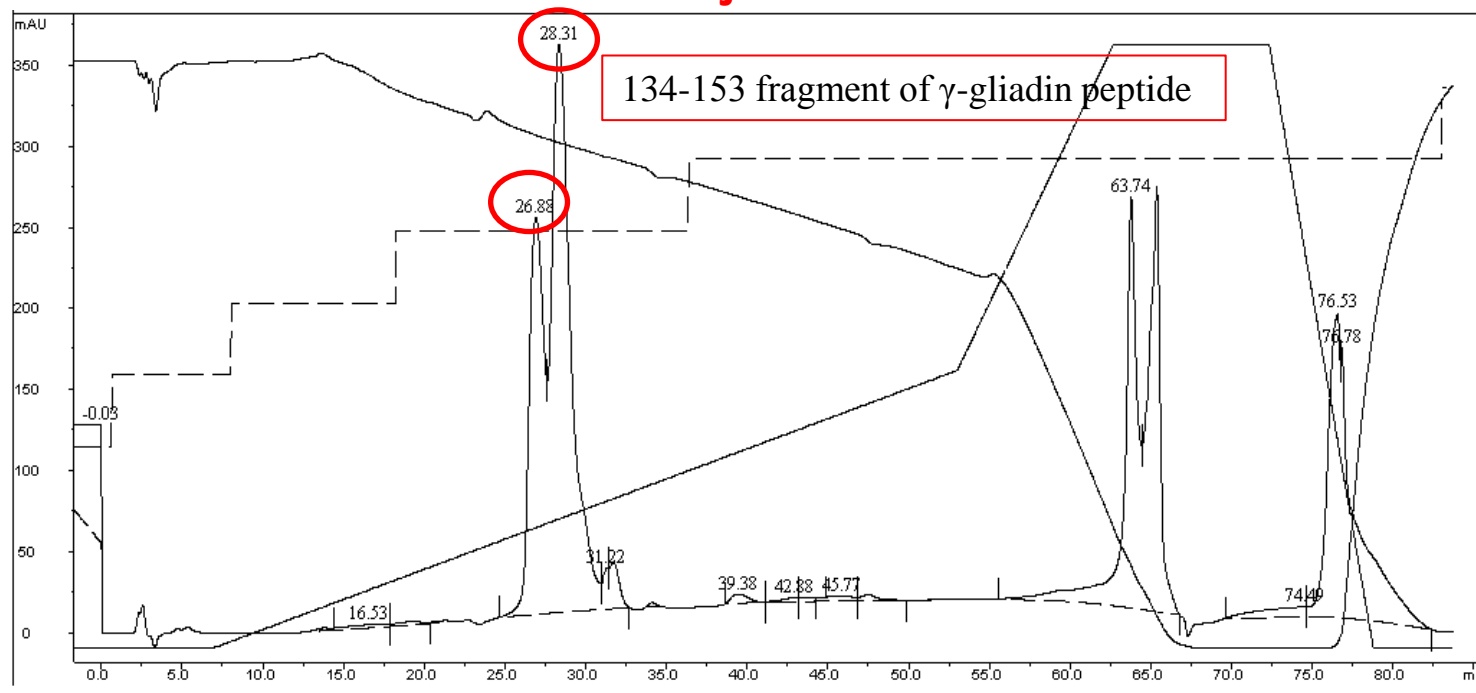

K

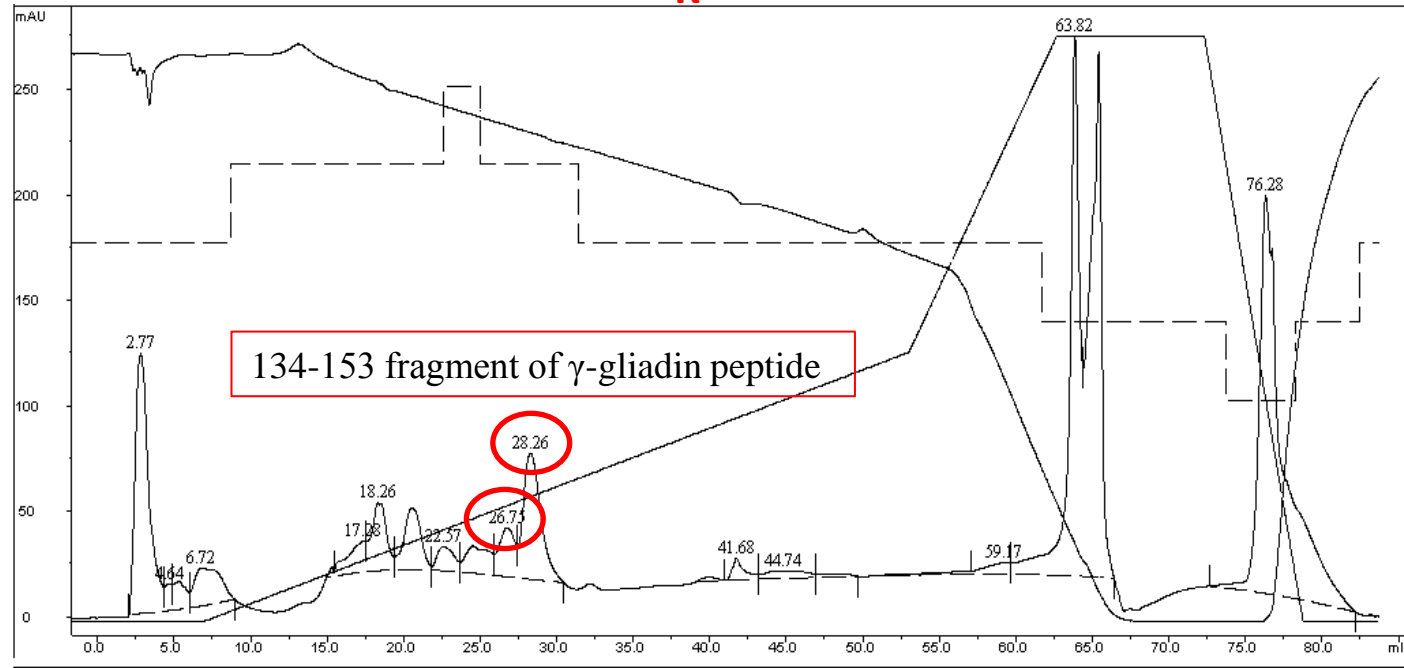

L

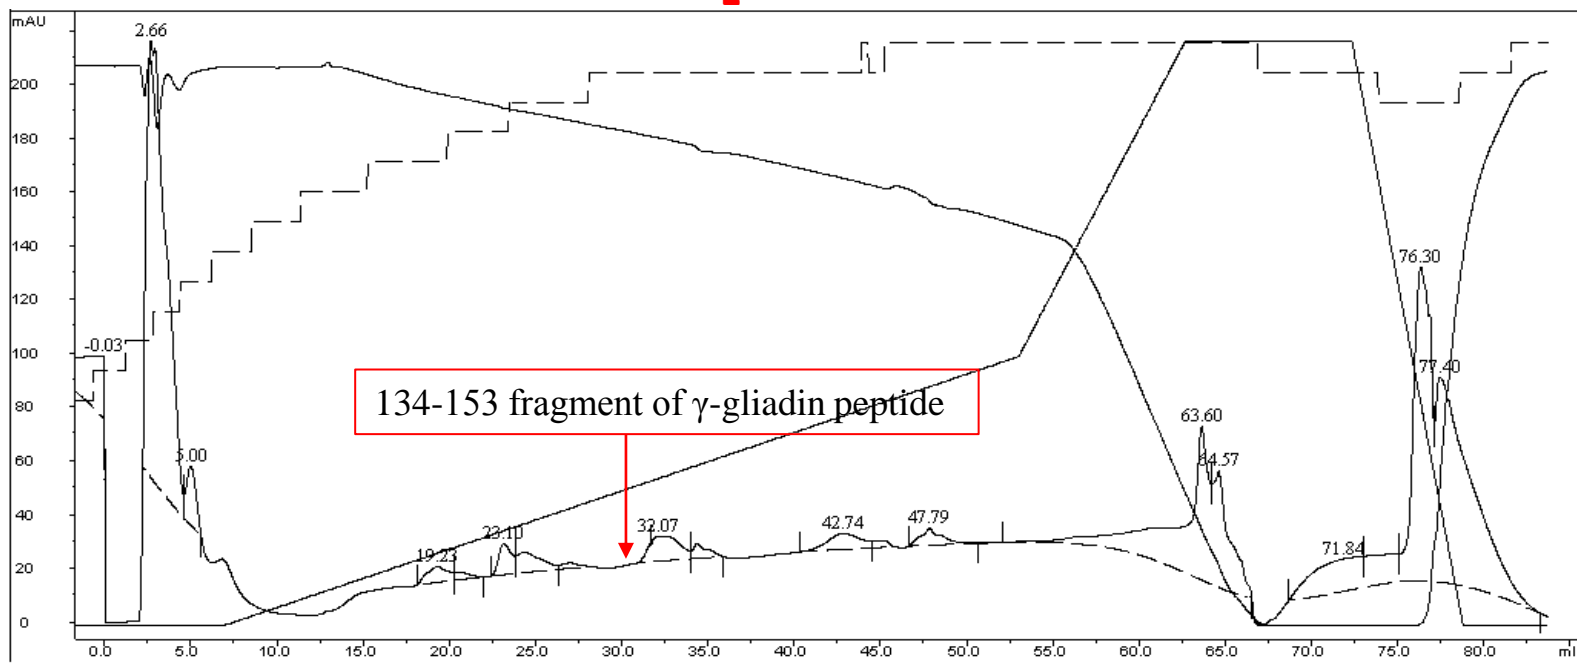

Supplement: s1 [file s1]

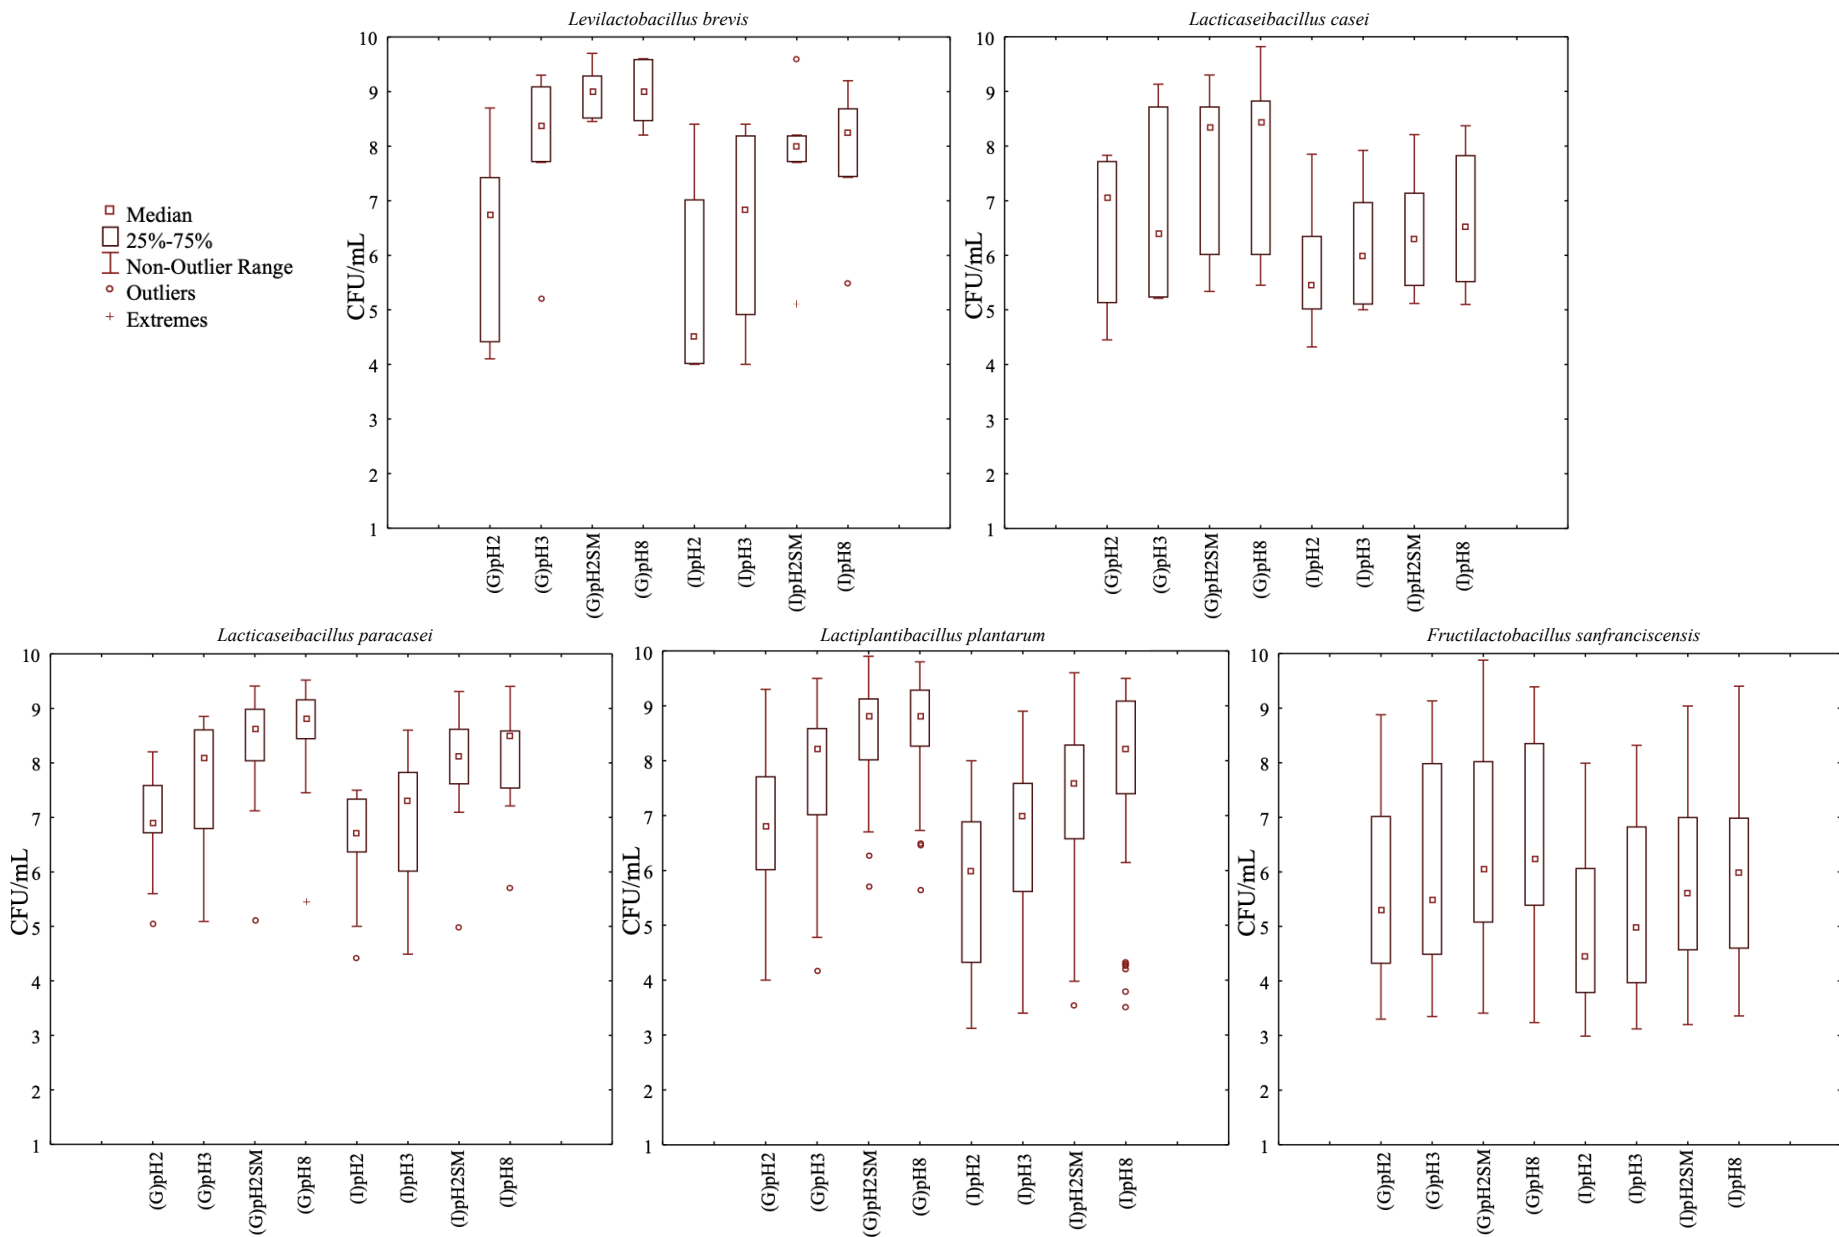

□ Median  
□ 25%-75%  
+ Non-Outlier Range  
○ Outliers  
+ Extremes

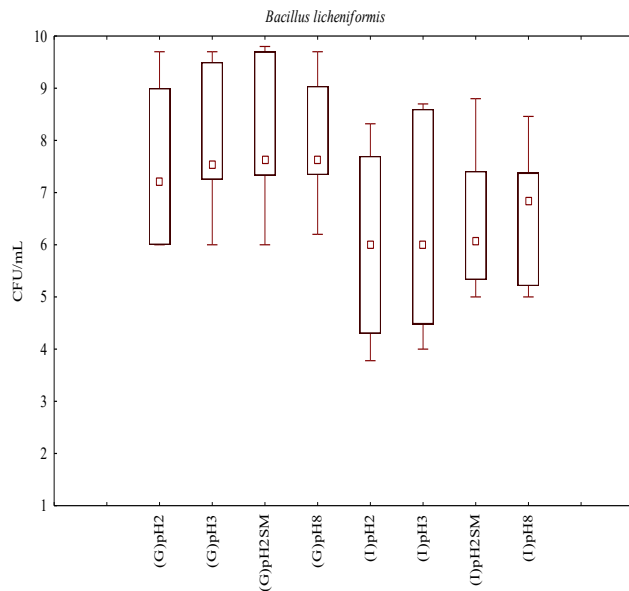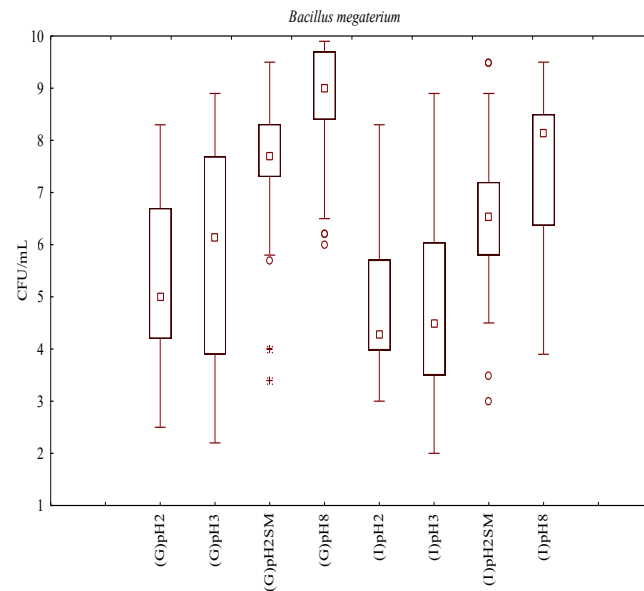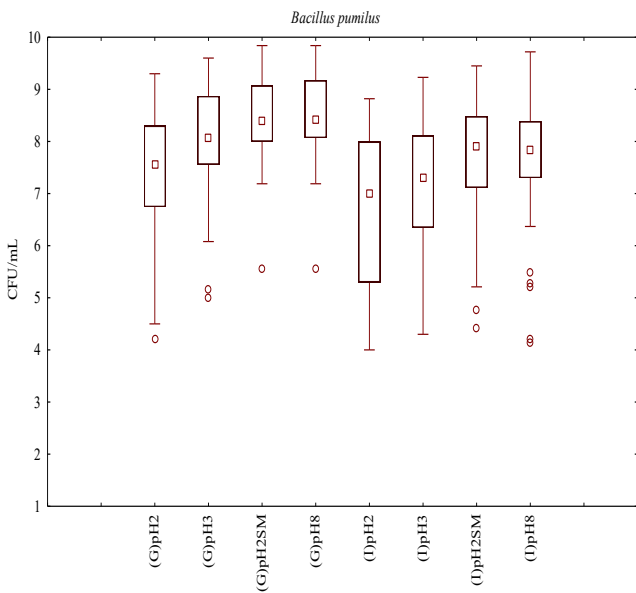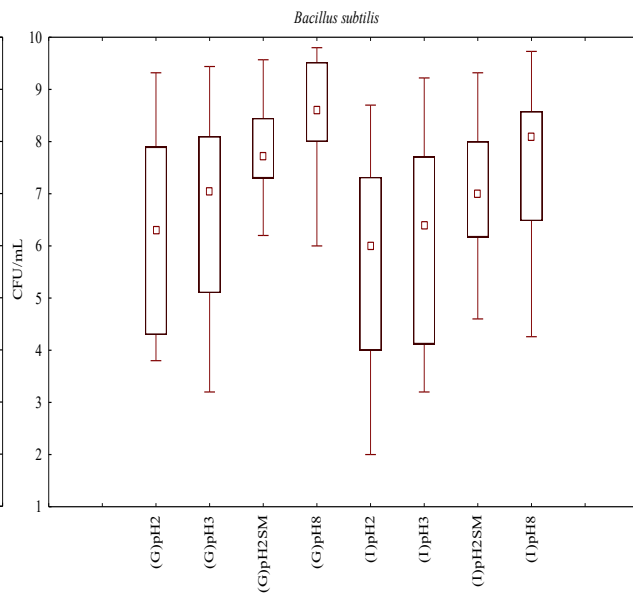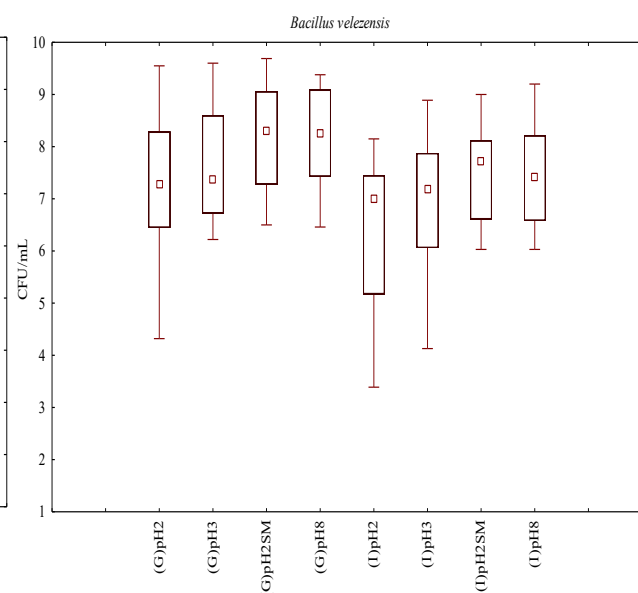

Supplement: s1 [file s1]
